# Supplementary material for: Functional dissection of the ARGONAUTE7 promoter
Source: PubMed Central journal article supplement (PMC6508778; doi:10.1002/pld3.102), 2019-01-02
Supplement: PLD3-3-e00102-s001.pdf [file PLD3-3-e00102-s001.pdf]

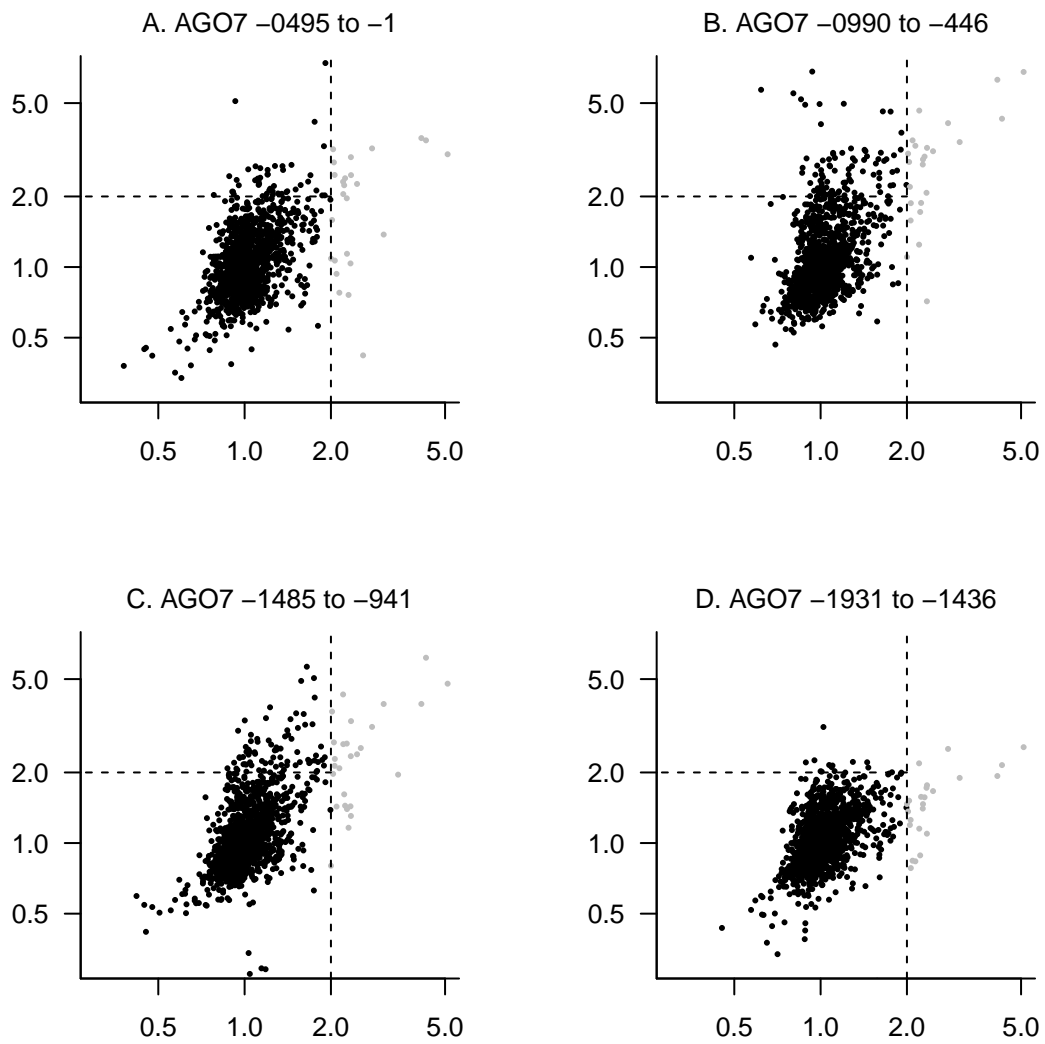

**Figure S1.** Scatterplots of  $\beta$ -gal activities with likely nonspecific activators indicated for *AGO7* promoter fragment screens. Panel B is equivalent to Figure 1C.

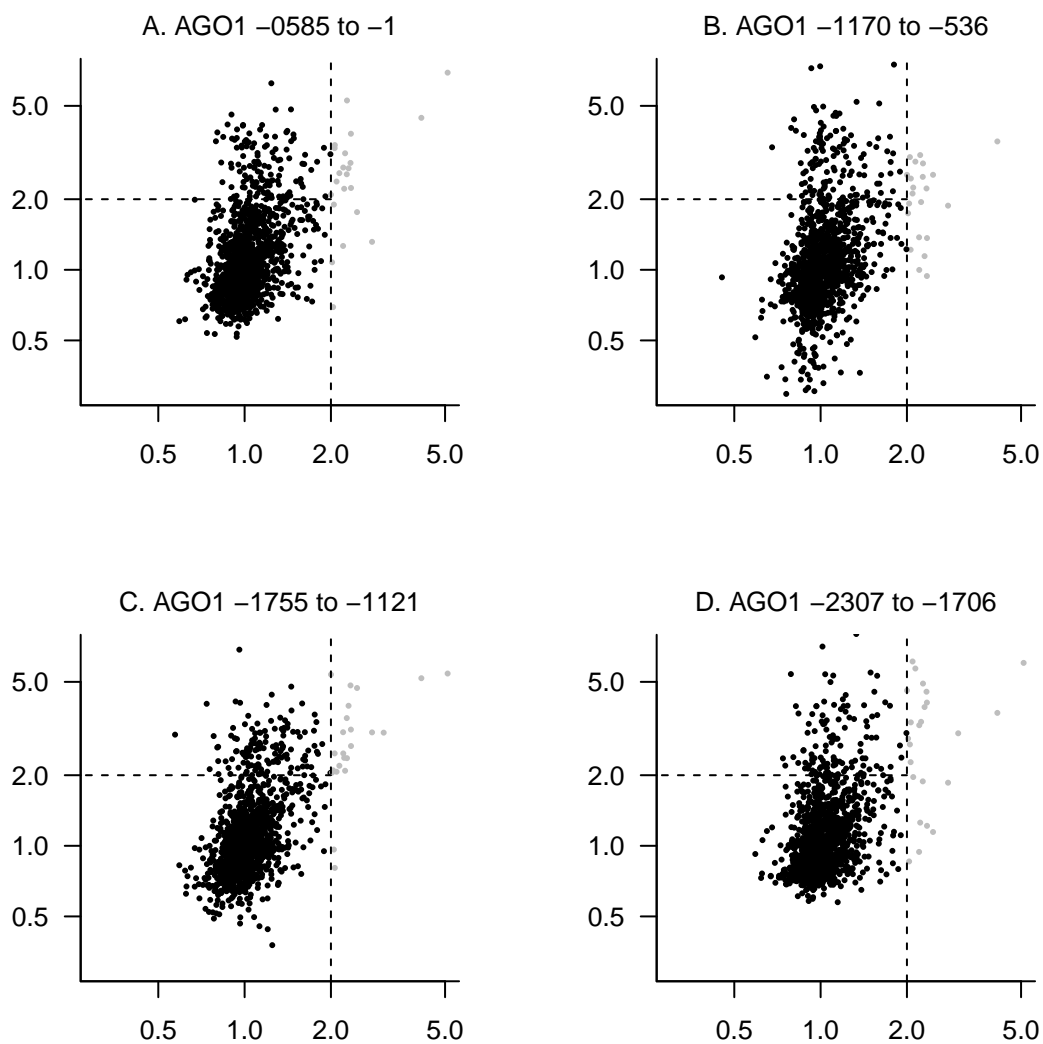

**Figure S2.** Scatterplots of  $\beta$ -gal activities with likely nonspecific activators indicated as in Figure 1C for *AGO1* promoter fragment screens.

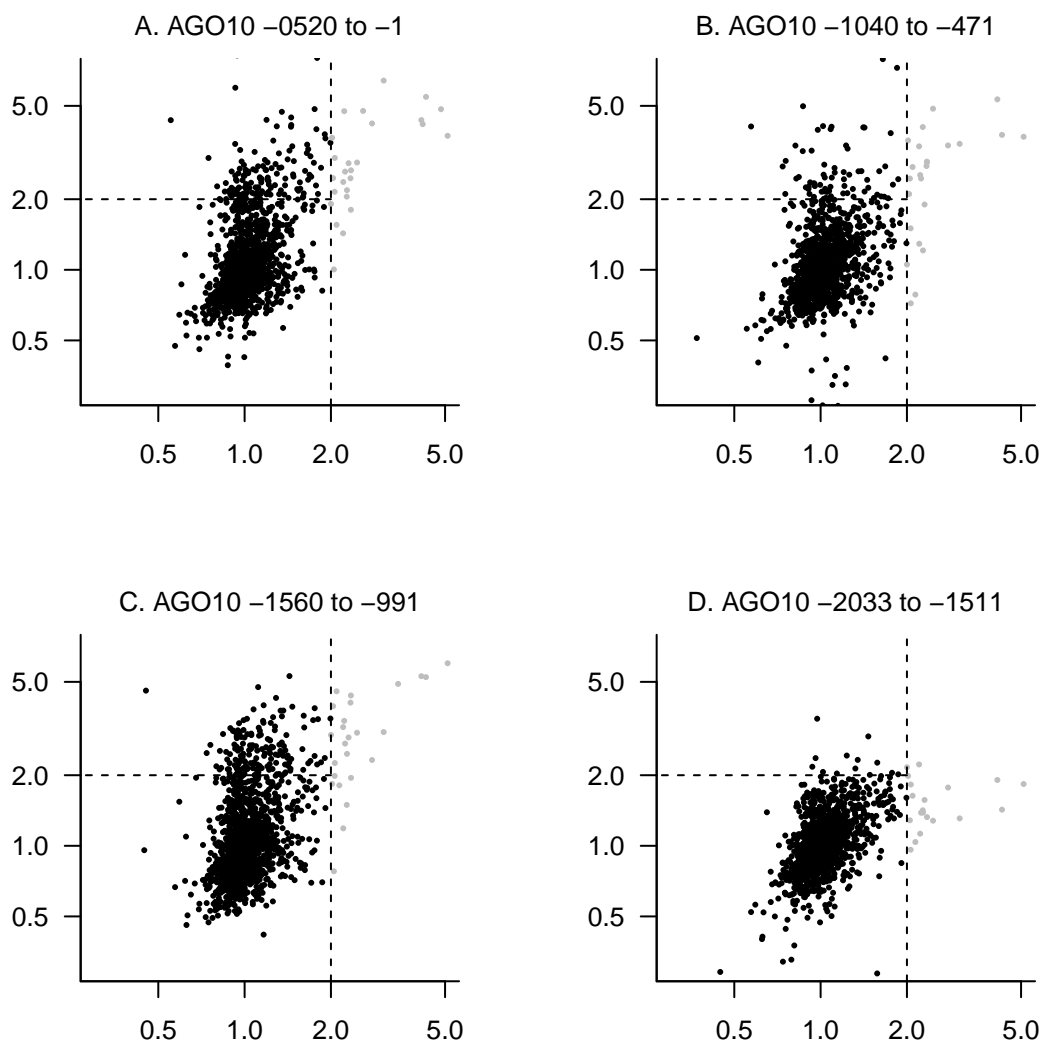

**Figure S3.** Scatterplots of  $\beta$ -gal activities with likely nonspecific activators indicated as in Figure 1C for *AGO10* promoter fragment screens.

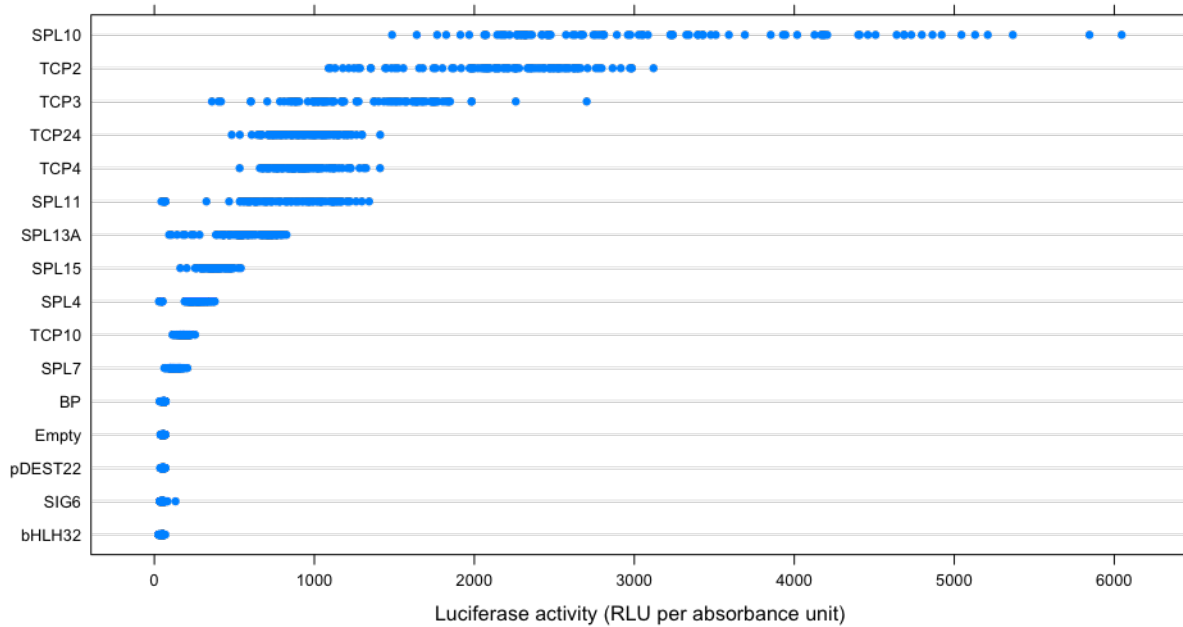

**Figure S4.** Targeted Y1H assay using *Gaussia* luciferase reporter, quantified in terms of relative luminescence units per absorbance unit at 600 nm. TFs were tested against the *AGO7* -990/-446 region and are displayed in order by mean reporter activity.

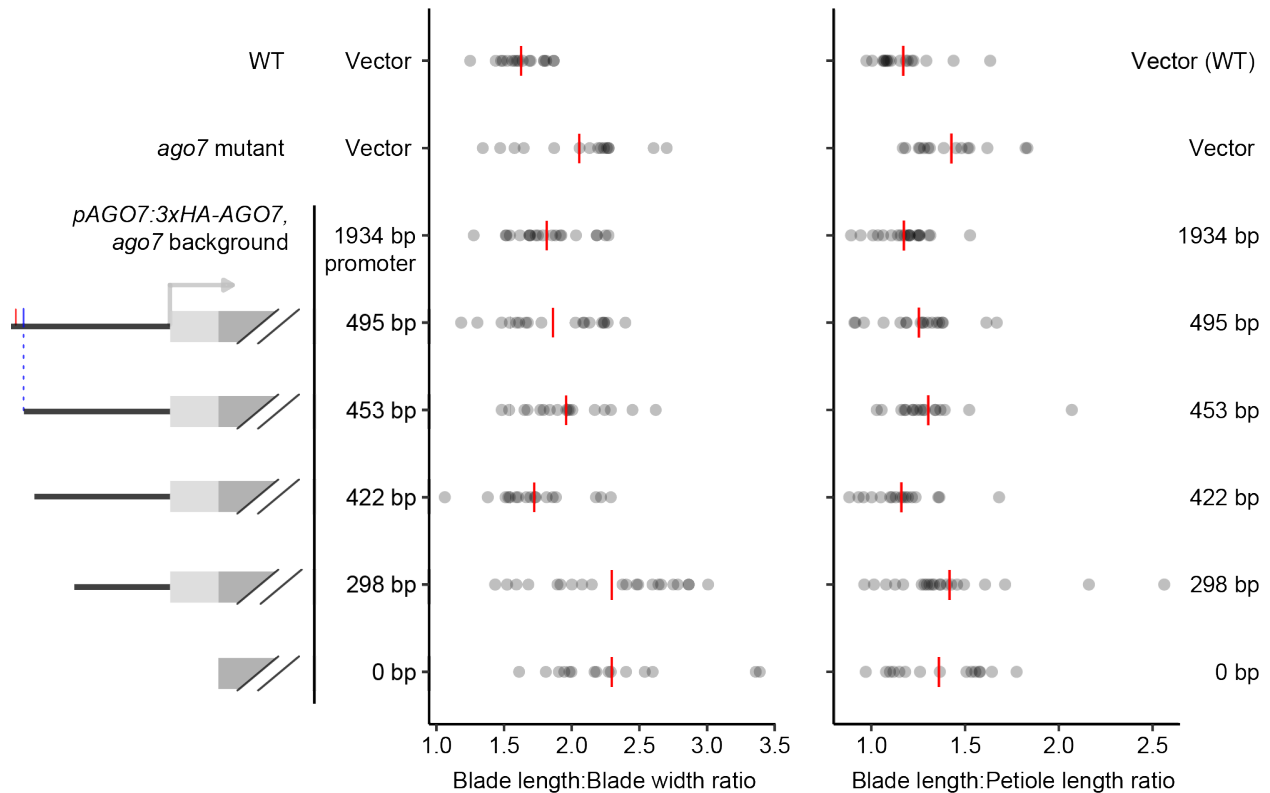

**Figure S5.** Complementation of *ago7* leaf shape defects, quantified based on leaf blade length-to-width ratio (left) and leaf-blade-length to petiole-length ratio (right) measured for true leaf 6 with calipers on days 28 to 30 days post-stratification. Each datapoint shows the ratio for a distinct primary transformant. Red lines indicate the mean for each genotype.

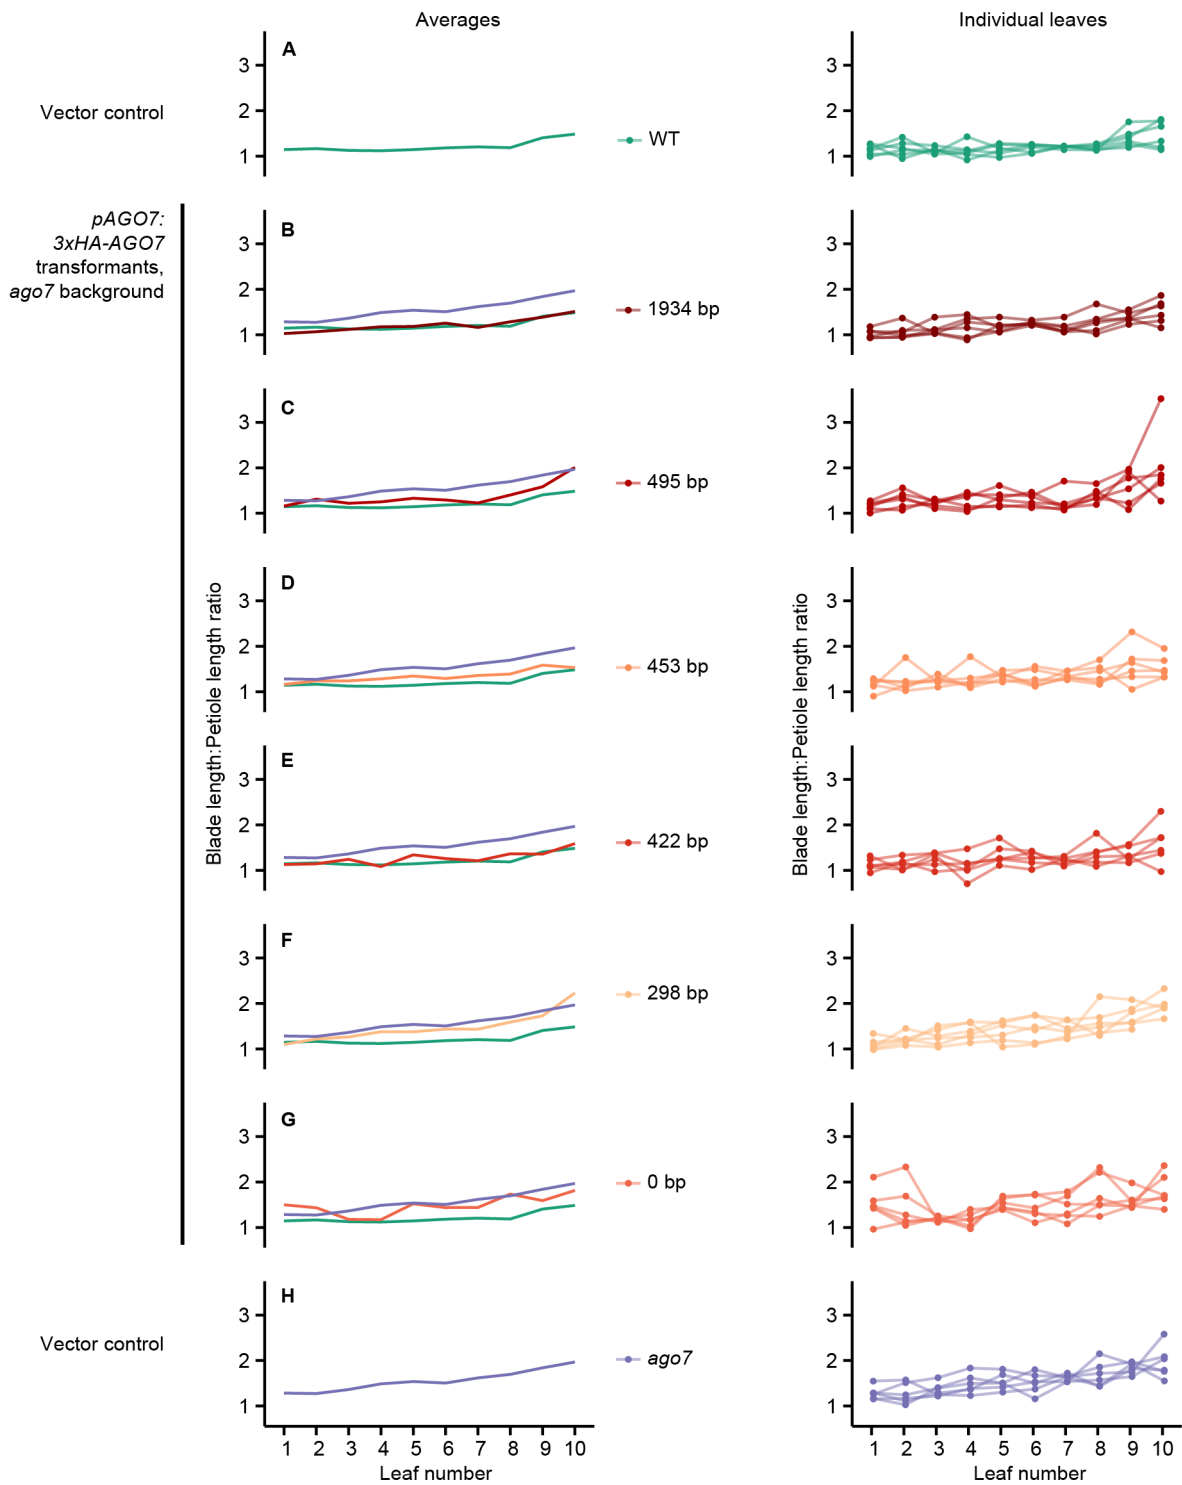

**Figure S6.** Complementation of *ago7* leaf shape defects, quantified based on leaf blade length to petiole length ratio. Panel layout is as in ??.

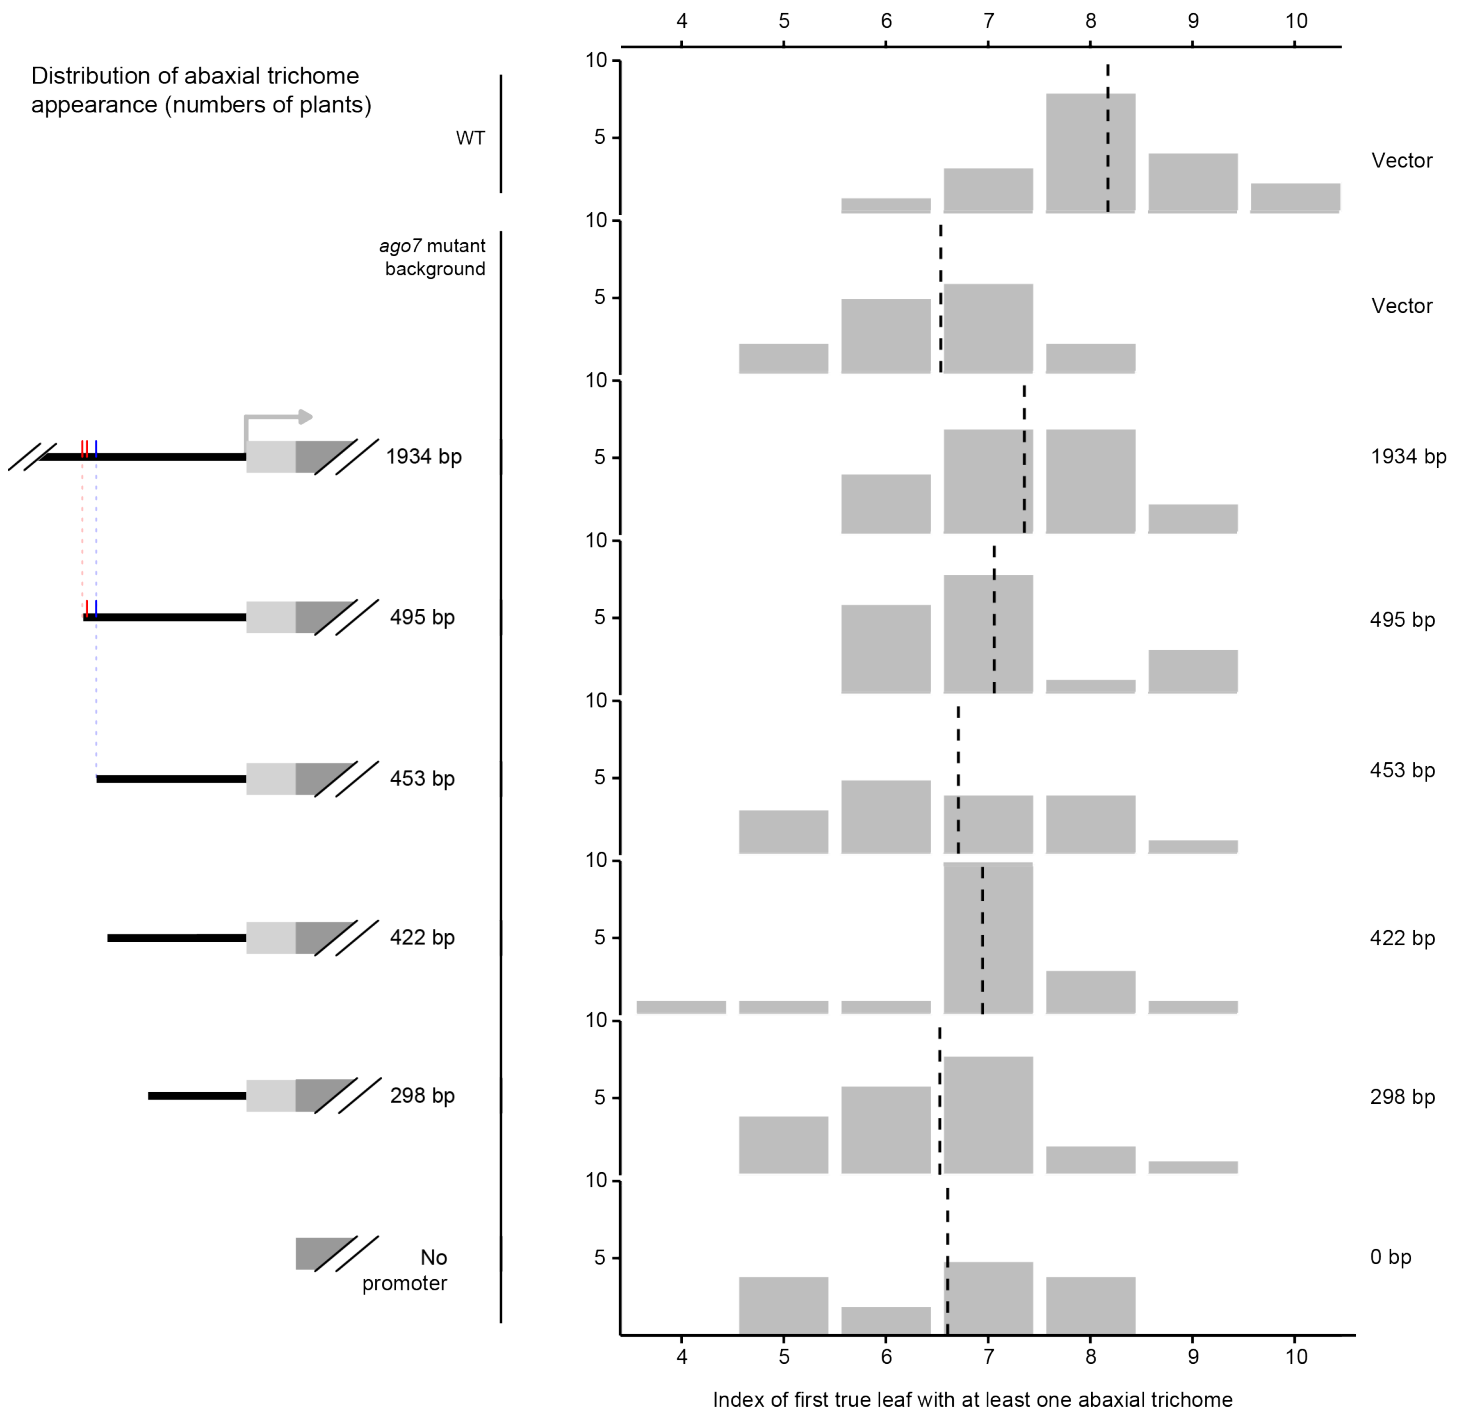

**Figure S7.** Assay for complementation of *ago7* early abaxial trichome appearance phenotype with 3xHA-AGO7 transgenes driven by truncated versions of the *AGO7* promoter. Dashed lines indicate the mean for each genotype. Core SPL (red) and TCP (blue) binding sites are indicated with tick marks.
